# Supplementary material
Source: publisher figshare collection journal article supplement (https://acs.figshare.com/ndownloader/files/14021237)
Supplement: Supplementary file 1 [file 14021237]

# Supporting Information

## Design, synthesis and biological activity of hydrogen peroxide responsive arylboronate melatonin hybrids

Annalida Bedini,<sup>†,§</sup> Alessandra Fraternale,<sup>‡,§</sup> Rita Crinelli,<sup>‡</sup> Michele Mari,<sup>†</sup> Silvia Bartolucci,<sup>†</sup>  
Laura Chiarantini,<sup>\*,‡</sup> Gilberto Spadoni<sup>\*,†</sup>

<sup>§</sup>These authors equally contributed to this work

\* Corresponding authors

<sup>†</sup>Department of Biomolecular Sciences, University of Urbino Carlo Bo, Piazza Rinascimento 6, I-61029 Urbino, Italy.

<sup>‡</sup>Department of Biomolecular Sciences, University of Urbino Carlo Bo, Via Saffi 2, I-61029 Urbino, Italy.

Gilberto Spadoni

\*Phone: +39 0722 303322; Fax: + 39 0722 303313; E-mail: [gilberto.spadoni@uniurb.it](mailto:gilberto.spadoni@uniurb.it)

Laura Chiarantini

\*Phone: +39 0722 305220; E-mail: [laura.chiarantini@uniurb.it](mailto:laura.chiarantini@uniurb.it)

## Table of Contents

Page S2: Supplementary Figures S1 and S2

Page S3: Supplementary Figure S3

Page S4: Supplementary Figure S4

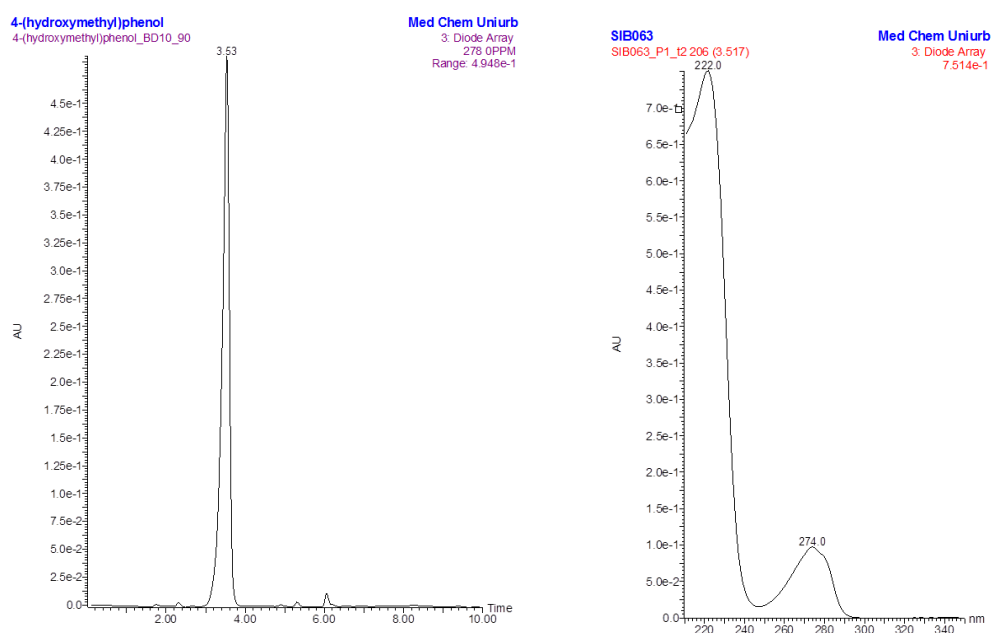

**Figure S1.** HPLC trace of an authentic sample of *p*-hydroxybenzyl alcohol (*p*-HBA,  $R_t=3.52$ ) and its UV spectra.

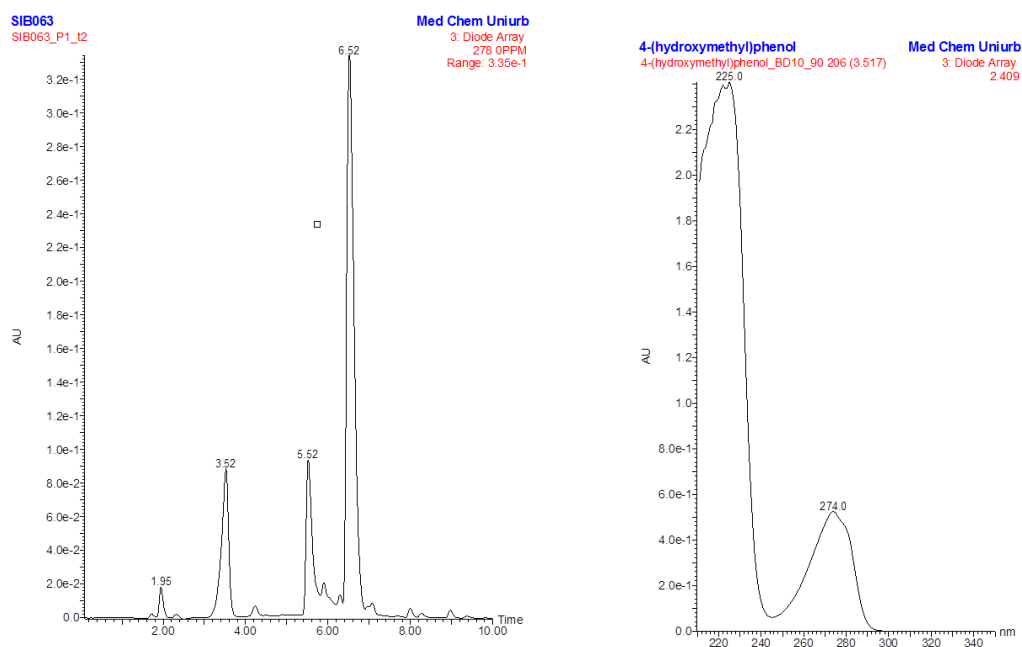

**Figure S2.** HPLC chromatogram ( $\lambda=278$  nm) of activation of **P1** by  $H_2O_2$  (after 15 min) and UV spectra of the peak at  $R_t=3.52$

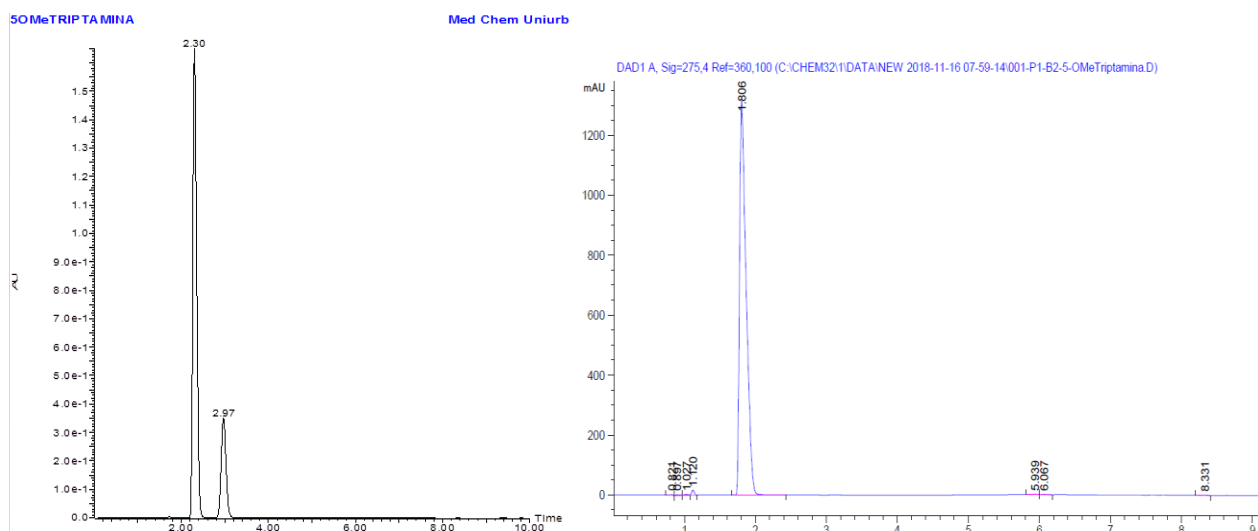

**Figure S3.** HPLC traces of an authentic sample of 5-MeOT solubilized in a 1:1 v/v  $\text{CH}_3\text{CN}$ /physiological buffer saline. Right: linear gradient from a 10/90 (v/v) mixture  $\text{CH}_3\text{CN}/\text{HCOOH}$  0.1% in  $\text{H}_2\text{O}$  to a 90/10 mixture in 8 minutes and then 90/10 mixture for 2 min. Left: 20/80 (v/v) mixture  $\text{CH}_3\text{CN}/\text{HCOO}^-\text{NH}_4^+$  (10 mM) in  $\text{H}_2\text{O}$  for 2 min, then linear gradient to 100%  $\text{CH}_3\text{CN}$  in 8 minutes.

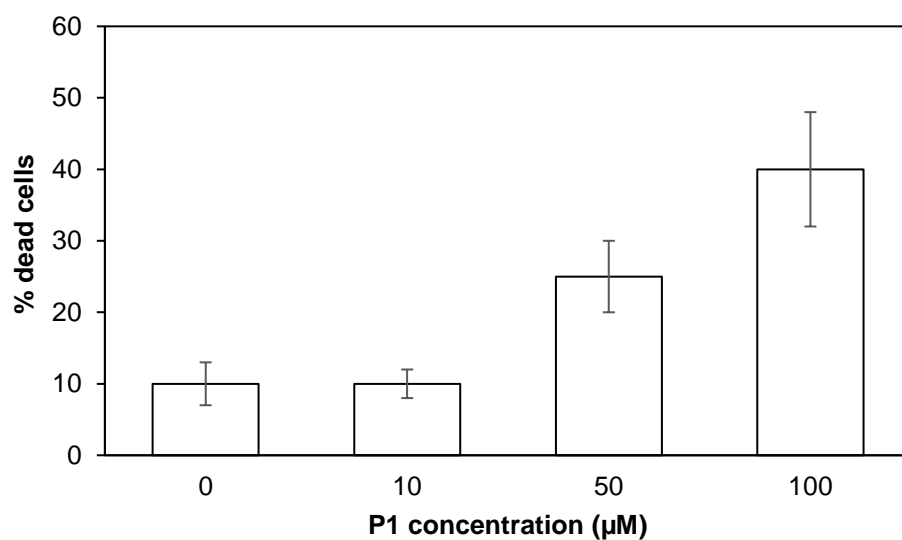

**Figure S4.** Trypan blue assay after exposure of HeLa cells to **P1** at 10, 50, 100  $\mu\text{M}$  for 24 h. At this time the total number of live and dead cells was counted by an automated cell counter. Data are the mean  $\pm$  SD of two separate experiments each carried out in triplicate.
